# Supplementary material for: RTN3 inhibits RIG-I-mediated antiviral responses by impairing TRIM25-mediated K63-linked polyubiquitination
Source: eLife. 2021 Jul 27;10:e68958. doi: 10.7554/eLife.68958 (PMC8315805; doi:10.7554/eLife.68958)
Supplement: Figure 1—figure supplement 1—source data 2. [file elife-68958-fig1-figsupp1-data2.xlsx]

## Sheet: Sheet1
	VSV-eGFP	RTN3
	Time (h)	mRNA (fold)		P value by t test	P value summary
	0	1.02425	0.975745
	12	1.02425	1.21805	0.349	ns
	15	4.06872	3.82266	0.0018	**
	18	5.55804	5.33163	0.0005	***
	21	5.44365	5.63563	0.0007	***
	24	35.8668	39.5218	0.0025	***
