# Supplementary material for: RTN3 inhibits RIG-I-mediated antiviral responses by impairing TRIM25-mediated K63-linked polyubiquitination
Source: eLife. 2021 Jul 27;10:e68958. doi: 10.7554/eLife.68958 (PMC8315805; doi:10.7554/eLife.68958)
Supplement: Figure 1—figure supplement 1—source data 3. [file elife-68958-fig1-figsupp1-data3.xlsx]

## Sheet: Sheet1
	VSV-eGFP	RTN3
	Time (h)	mRNA (fold)		P value by t test	P value summary
	0	0.81166	1.18834
	12	4.88699	4.55973	0.0045	**
	15	5.65273	3.70365	0.0657	ns
	18	5.42246	4.28397	0.0234	*
	21	6.10058	5.73164	0.0029	**
	24	4.92099	5.02439	0.0024	**
