# Supplementary material for: RTN3 inhibits RIG-I-mediated antiviral responses by impairing TRIM25-mediated K63-linked polyubiquitination
Source: eLife. 2021 Jul 27;10:e68958. doi: 10.7554/eLife.68958 (PMC8315805; doi:10.7554/eLife.68958)
Supplement: Figure 1—figure supplement 1—source data 4. [file elife-68958-fig1-figsupp1-data4.xlsx]

## Sheet: Sheet1
		Ctrl		poly (I:C）		P value by t test	P value summary
		group 1	group 2	group 1	group 2
	aggregation in total	39	59	138	128
	aggregation/cell	1.95	2.95	6.9	6.4	0.0173	*
