# Supplementary material for: RTN3 inhibits RIG-I-mediated antiviral responses by impairing TRIM25-mediated K63-linked polyubiquitination
Source: eLife. 2021 Jul 27;10:e68958. doi: 10.7554/eLife.68958 (PMC8315805; doi:10.7554/eLife.68958)
Supplement: Figure 1—source data 2. [file elife-68958-fig1-data2.xlsx]

## Sheet: Sheet1
	VSV-eGFP	RTN3
	Time (h)	mRNA (fold)		P value by t test	P value summary
	0	1.04502	0.954976
	15	57.8216	46.6413	0.0117	*
	18	129.207	136.574	0.0008	***
	24	27.7331	33.6734	0.0099	**
	VSV-eGFP	TNFα
	Time (h)	mRNA (fold)		P value by t test	P value summary
	0	1.21494	0.785063
	15	1.25778	1.47517	0.0137	*
	18	2.20516	1.68282	0.0198	*
	24	10.0623	15.7894	0.001	**
