# Supplementary material for: RTN3 inhibits RIG-I-mediated antiviral responses by impairing TRIM25-mediated K63-linked polyubiquitination
Source: eLife. 2021 Jul 27;10:e68958. doi: 10.7554/eLife.68958 (PMC8315805; doi:10.7554/eLife.68958)
Supplement: Figure 1—source data 3. [file elife-68958-fig1-data3.xlsx]

## Sheet: Sheet1
	poly (I:C)	RTN3
	Time (h)	mRNA (fold)		P value by t test	P value summary
	0	1.08299	0.917014
	15	10.447	11.2747	0.0018	**
	18	21.0393	20.3226	0.0003	***
	24	6.566	5.5984	0.0092	**
	poly (I:C)	TNFα
	Time (h)	mRNA (fold)		P value by t test	P value summary
	0	1.21494	0.785063
	15	1.25778	1.47517	0.0043	**
	18	2.20516	1.68282	0.085	ns
	24	10.0623	15.7894	0.06	ns
