# Supplementary material for: RTN3 inhibits RIG-I-mediated antiviral responses by impairing TRIM25-mediated K63-linked polyubiquitination
Source: eLife. 2021 Jul 27;10:e68958. doi: 10.7554/eLife.68958 (PMC8315805; doi:10.7554/eLife.68958)
Supplement: Figure 1—source data 4. [file elife-68958-fig1-data4.xlsx]

## Sheet: Sheet1
	TNFα	RTN3
	Time (h)	mRNA (fold)		P value by t test	P value summary
	0	1.21494	0.785063
	6	1.25778	1.47517	0.2675	ns
	12	2.20516	1.68282	0.108	ns
	24	10.0623	15.7894	0.0033	**
	IFNβ	RTN3
	Time (h)	mRNA (fold)		P value by t test	P value summary
	0	1.02772	0.972281
	6	3.86226	2.86681	0.0417	*
	12	6.81846	11.4672	0.0727	ns
	24	10.9241	9.91385	0.0029	**
