# Supplementary material for: RTN3 inhibits RIG-I-mediated antiviral responses by impairing TRIM25-mediated K63-linked polyubiquitination
Source: eLife. 2021 Jul 27;10:e68958. doi: 10.7554/eLife.68958 (PMC8315805; doi:10.7554/eLife.68958)
Supplement: Figure 1—source data 5. [file elife-68958-fig1-data5.xlsx]

## Sheet: Sheet1
	VSV-eGFP	RTN3
	Time (h)	mRNA (fold)		P value by t test	P value summary
	0	0.927348	1.07265
	12	1.77914	1.45516	0.0737	ns
	15	9.52146	11.8859	0.0146	*
	18	8.94563	9.92579	0.0034	**
	21	16.6931	15.9025	0.0007	***
	24	10.5647	9.99483	0.001	**
