# Supplementary material for: RTN3 inhibits RIG-I-mediated antiviral responses by impairing TRIM25-mediated K63-linked polyubiquitination
Source: eLife. 2021 Jul 27;10:e68958. doi: 10.7554/eLife.68958 (PMC8315805; doi:10.7554/eLife.68958)
Supplement: Figure 2—figure supplement 1—source data 1. [file elife-68958-fig2-figsupp1-data1.xlsx]

## Sheet: Sheet1
					Dunnett's multiple comparisons test
	MDA5	RTN3	ISRE-luc			P value summary
	-	-	1.03863	0.961366
	+	-	110.399	90.2481
	+	+	80.6876	81.4451	0.1678	ns
	+	++	50.6393	54.5479	0.0177	*
