# Supplementary material for: RTN3 inhibits RIG-I-mediated antiviral responses by impairing TRIM25-mediated K63-linked polyubiquitination
Source: eLife. 2021 Jul 27;10:e68958. doi: 10.7554/eLife.68958 (PMC8315805; doi:10.7554/eLife.68958)
Supplement: Figure 2—figure supplement 1—source data 2. [file elife-68958-fig2-figsupp1-data2.xlsx]

## Sheet: Sheet1
					Dunnett's multiple comparisons test
	TLR3	RTN3	ISRE-luc			P value summary
	-	-	1.01729	0.982714
	+	-	8.48189	7.91697
	+	+	12.3127	12.5594	0.0002	***
	+	++	8.37149	8.66173	0.5929	ns
