# Supplementary material for: RTN3 inhibits RIG-I-mediated antiviral responses by impairing TRIM25-mediated K63-linked polyubiquitination
Source: eLife. 2021 Jul 27;10:e68958. doi: 10.7554/eLife.68958 (PMC8315805; doi:10.7554/eLife.68958)
Supplement: Figure 2—figure supplement 1—source data 3. [file elife-68958-fig2-figsupp1-data3.xlsx]

## Sheet: Sheet1
					Dunnett's multiple comparisons test
	cGAS +STING
		RTN3	ISRE-luc			P value summary
	-	-	0.638228	1.36177
	+	-	21.8325	32.4886
	+	+	29.7429	26.6003	0.8723	ns
	+	++	32.9743	32.9807	0.3889	ns
