# Supplementary material for: RTN3 inhibits RIG-I-mediated antiviral responses by impairing TRIM25-mediated K63-linked polyubiquitination
Source: eLife. 2021 Jul 27;10:e68958. doi: 10.7554/eLife.68958 (PMC8315805; doi:10.7554/eLife.68958)
Supplement: Figure 2—figure supplement 1—source data 4. [file elife-68958-fig2-figsupp1-data4.xlsx]

## Sheet: Sheet1
					Dunnett's multiple comparisons test
	IRF3(5D）	RTN3	ISRE-luc			P value summary
	-	-	1.01729	0.982714
	+	-	129.717	141.449
	+	+	159.236	150.221	0.1651	ns
	+	++	125.665	139.504	0.9118	ns
