# Supplementary material for: RTN3 inhibits RIG-I-mediated antiviral responses by impairing TRIM25-mediated K63-linked polyubiquitination
Source: eLife. 2021 Jul 27;10:e68958. doi: 10.7554/eLife.68958 (PMC8315805; doi:10.7554/eLife.68958)
Supplement: Figure 2—figure supplement 1—source data 5. [file elife-68958-fig2-figsupp1-data5.xlsx]

## Sheet: Sheet1
			A490 value
			Ctrl			RTN3
		Sample	0.334	0.346	0.352	0.357	0.364	0.373
		Blank	0.273	0.276	0.266	0.273	0.276	0.266
		Difference	0.061	0.07	0.086	0.084	0.088	0.107	P value by t test	P value summary
	Relative absorbance	0.0723333	0.843318	0.967742	1.18894	1.16129	1.21659	1.47926	0.1124	ns
