# Supplementary material for: RTN3 inhibits RIG-I-mediated antiviral responses by impairing TRIM25-mediated K63-linked polyubiquitination
Source: eLife. 2021 Jul 27;10:e68958. doi: 10.7554/eLife.68958 (PMC8315805; doi:10.7554/eLife.68958)
Supplement: Figure 2—figure supplement 1—source data 6. [file elife-68958-fig2-figsupp1-data6.xlsx]

## Sheet: Sheet1
		VSV gRNA
	VSV-eGFP	mRNA (fold)
	Time (h)	HA-Ev		HA-RTN3		P value by t test	P value summary
	15	1.54753	2.08488	12.0837	17.448	0.0407	*
	18	1.91848	2.26571	34.2959	35.5054	0.0004	***
	21	2.85797	2.3538	403.099	408.726	<0.0001	****
