# Supplementary material for: RTN3 inhibits RIG-I-mediated antiviral responses by impairing TRIM25-mediated K63-linked polyubiquitination
Source: eLife. 2021 Jul 27;10:e68958. doi: 10.7554/eLife.68958 (PMC8315805; doi:10.7554/eLife.68958)
Supplement: Figure 2—figure supplement 1—source data 7. [file elife-68958-fig2-figsupp1-data7.xlsx]

## Sheet: Sheet1
		IFNβ				Sidak's multiple comparisons test	P value summary
	VSV-eGFP	mRNA (fold)
	Time (h)	THP-1-HA-Ev		THP-1-HA-RTN3
	0	0.566329	1.43367	1.11387	0.886127	>0.9999	ns
	12	50.9042	99.0245	0.139234	0.201044	0.0011	**
	15	83.2693	125.341	0.16789	0.391093	<0.0001	***
	18	94.3345	69.5372	0.229344	0.267125	0.0005	****
	21	34.5284	28.2409	0.159938	0.162171	0.2476	ns
	24	2.29694	2.49617	0.245805	0.468326	>0.9999	ns
		IFIT1				Sidak's multiple comparisons test	P value summary
	VSV-eGFP	mRNA (fold)
	Time (h)	THP-1-HA-Ev		THP-1-HA-RTN3
	0	0.965357	1.03464	0.882707	1.11729	>0.9999	ns
	12	27.0796	23.5741	0.54337	0.550955	<0.0001	****
	15	29.225	29.4283	0.414662	0.62851	<0.0001	****
	18	26.5223	31.3226	0.590499	0.752627	<0.0001	****
	21	22.6138	15.9904	0.763133	0.594606	<0.0001	****
	24	15.5531	15.5531	0.456918	0.400537	<0.0001	****
		IFIT2				Sidak's multiple comparisons test	P value summary
	VSV-eGFP	mRNA (fold)
	Time (h)	THP-1-HA-Ev		THP-1-HA-RTN3
	0	1.0554	0.944605	0.972281	1.02772	>0.9999	ns
	12	39.0644	36.1966	0.432103	0.417384	<0.0001	****
	15	50.8362	56.0166	0.384071	0.517434	<0.0001	****
	18	52.6289	55.2454	0.459917	0.535681	<0.0001	****
	21	35.4517	26.4975	0.554572	0.574128	<0.0001	****
	24	28.7957	25.5949	0.400381	0.392141	<0.0001	****
