# Supplementary material for: RTN3 inhibits RIG-I-mediated antiviral responses by impairing TRIM25-mediated K63-linked polyubiquitination
Source: eLife. 2021 Jul 27;10:e68958. doi: 10.7554/eLife.68958 (PMC8315805; doi:10.7554/eLife.68958)
Supplement: Figure 2—figure supplement 1—source data 8. [file elife-68958-fig2-figsupp1-data8.xlsx]

## Sheet: Sheet1
											Dunnett's multiple comparisons test	P value summary
		mRNA (fold)
		Ctrl		RTN3-1		RTN3-2
	IL-1α	1.0104	0.989603	0.501709	0.501709	0.474645	0.418971			IL-1α
	IL-1β	1.20168	0.798325	1.84683	1.75936	1.54226	1.59665			Ctrl vs. RTN3-1	0.0031	**
	IL-2	1.08299	0.917014	1.36133	1.42901	1.01046	0.996551			Ctrl vs. RTN3-2	0.001	***
	IL-3	1.03118	0.968818	0.792398	0.809048	0.471163	0.396199
	IL-4	1.07954	0.920456	0.717187	0.611499	0.566607	0.466653			IL-1β
	IL-5	1.01733	0.982673	1.03153	1.12879	1.25248	1.0103			Ctrl vs. RTN3-1	<0.0001	****
	IL-6	1.00347	0.996534	0.268872	0.190121	0.709557	0.671282			Ctrl vs. RTN3-2	0.0007	***
	IL-7	1.15809	0.841913	1.49666	1.57107	1.19893	1.03652
	IL-8	1.15809	0.841913	0.012274	0.00996954	0.166287	0.10895			IL-2
	IL-10	0.691535	1.30846	2.30997	1.9157	1.39269	0.998528			Ctrl vs. RTN3-1	0.0221	*
	IL-12	1.05194	0.948061	1.59444	1.6167	1.00212	0.995195			Ctrl vs. RTN3-2	0.9996	ns
	IL-13	0.788371	1.21163	1.30762	1.02594	1.21163	1.38218
	IL-16	1.17493	0.825066	1.17493	1.23335	0.559643	0.548127			IL-3
	IL-17A	0.852066	1.14793	1.75205	1.89086	1.41327	2.69267			Ctrl vs. RTN3-1	0.3322	ns
	IL-17C	1.0623	0.9377	2.13939	2.16926	1.28093	1.14647			Ctrl vs. RTN3-2	0.0007	***
	IL-17F	0.989602	1.0104	1.3425	1.16064	1.2526	1.21835
	IL-18	0.923901	1.0761	2.30667	2.05027	1.63106	1.78486			IL-4
	IL-18BP	1	1	0.668964	0.650671	0.823591	0.716978			Ctrl vs. RTN3-1	0.0582	ns
	IL-22	1.04848	0.951518	0.0664449	0.0603	0.058246	0.0895168			Ctrl vs. RTN3-2	0.0042	**
	IL-26	0.917014	1.08299	0.809451	0.826459	0.873582	0.891938
	IL-1β antisense	0.979209	1.02079	1.12482	1.13264	1.12482	1.03504			IL-5
	IL33	0.910134	1.08987	1.15201	1.09745	0.760042	0.797829			Ctrl vs. RTN3-1	0.8238	ns
	IL-RI	1.0381	0.961895	0.393368	0.367025	0.451861	0.467796			Ctrl vs. RTN3-2	0.6039	ns
	IL-1RI	0.972281	1.02772	0.45674	0.486141	0.619616	0.566224
	IL-1RII	1.12071	0.879291	0.76018	0.424669	0.280177	0.445783			IL-6
	IL-1Rα	1.09674	0.903263	0.941621	0.866468	0.872494	0.848636			Ctrl vs. RTN3-1	<0.0001	****
	IL-2Rα	0.78176	1.21824	0.317493	0.222951	0.512207	0.533958			Ctrl vs. RTN3-2	0.0855	ns
	IL-2Rβ	0.937698	1.0623	1.07713	1.37287	1.13855	1.2373
	IL-2Rγ	0.903263	1.09674	0.743919	0.770153	1.02329	0.791805			IL-7
	IL-7R	0.989603	1.0104	0.749979	0.719428	1.5209	1.77144			Ctrl vs. RTN3-1	0.0015	**
	IL-18R1	0.869058	1.13094	0.710804	0.788687	0.899705	0.618791			Ctrl vs. RTN3-2	0.6645	ns
	IL-18R2	1.16146	0.838536	0.534382	0.317746	0.568781	0.538099
	LTA	0.920456	1.07954	0.387004	0.510655	0.293294	0.37904			IL-8
	LTB	1.04156	0.958435	0.292955	0.414301	0.510065	0.513613			Ctrl vs. RTN3-1	<0.0001	****
	MIF	1.0104	0.989603	0.849639	0.734545	0.8615	0.744798			Ctrl vs. RTN3-2	<0.0001	****
	OSM	1.07954	0.920456	0.717187	0.528663	0.0813576	0.15077
	TBX21	0.958435	1.04156	1.85157	1.7038	1.43272	1.30022			IL-10
	NKG2A	1.03464	0.965357	0.143501	0.222077	0.174238	0.17545			Ctrl vs. RTN3-1	<0.0001	****
	NAMPT	1.00347	0.996534	0.820737	0.898127	0.867533	0.861541			Ctrl vs. RTN3-2	0.3448	ns
	NKP30	1.03118	0.968818	0.675627	0.576063	0.458279	0.340163
	NKP44	1.00347	0.996534	0.552862	0.66204	0.436784	0.556707			IL-12
	FOXP3	0.875877	1.12412	1.52499	1.66879	2.02623	2.06881			Ctrl vs. RTN3-1	0.0003	***
										Ctrl vs. RTN3-2	>0.9999	ns
										IL-13
										Ctrl vs. RTN3-1	0.4531	ns
										Ctrl vs. RTN3-2	0.1023	ns
										IL-16
										Ctrl vs. RTN3-1	0.316	ns
										Ctrl vs. RTN3-2	0.0087	**
										IL-17A
										Ctrl vs. RTN3-1	<0.0001	****
										Ctrl vs. RTN3-2	<0.0001	****
										IL-17C
										Ctrl vs. RTN3-1	<0.0001	****
										Ctrl vs. RTN3-2	0.2854	ns
										IL-17F
										Ctrl vs. RTN3-1	0.1848	ns
										Ctrl vs. RTN3-2	0.2237	ns
										IL-18
										Ctrl vs. RTN3-1	<0.0001	****
										Ctrl vs. RTN3-2	<0.0001	****
										IL-18BP
										Ctrl vs. RTN3-1	0.0543	ns
										Ctrl vs. RTN3-2	0.2391	ns
										IL-22
										Ctrl vs. RTN3-1	<0.0001	****
										Ctrl vs. RTN3-2	<0.0001	****
										IL-26
										Ctrl vs. RTN3-1	0.3937	ns
										Ctrl vs. RTN3-2	0.6666	ns
										IL-1β antisense
										Ctrl vs. RTN3-1	0.6157	ns
										Ctrl vs. RTN3-2	0.8247	ns
										IL33
										Ctrl vs. RTN3-1	0.6334	ns
										Ctrl vs. RTN3-2	0.2635	ns
										IL-RI
										Ctrl vs. RTN3-1	0.0002	***
										Ctrl vs. RTN3-2	0.0013	**
										IL-1RI
										Ctrl vs. RTN3-1	0.0016	**
										Ctrl vs. RTN3-2	0.0179	*
										IL-1RII
										Ctrl vs. RTN3-1	0.0177	*
										Ctrl vs. RTN3-2	0.0001	***
										IL-1Rα
										Ctrl vs. RTN3-1	0.7593	ns
										Ctrl vs. RTN3-2	0.5685	ns
										IL-2Rα
										Ctrl vs. RTN3-1	<0.0001	****
										Ctrl vs. RTN3-2	0.0048	**
										IL-2Rβ
										Ctrl vs. RTN3-1	0.2521	ns
										Ctrl vs. RTN3-2	0.372	ns
										IL-2Rγ
										Ctrl vs. RTN3-1	0.2049	ns
										Ctrl vs. RTN3-2	0.7741	ns
										IL-7R
										Ctrl vs. RTN3-1	0.1557	ns
										Ctrl vs. RTN3-2	0.0001	***
										IL-18R1
										Ctrl vs. RTN3-1	0.1877	ns
										Ctrl vs. RTN3-2	0.2104	ns
										IL-18R2
										Ctrl vs. RTN3-1	0.0006	***
										Ctrl vs. RTN3-2	0.0087	**
										LTA
										Ctrl vs. RTN3-1	0.001	**
										Ctrl vs. RTN3-2	<0.0001	****
										LTB
										Ctrl vs. RTN3-1	0.0001	***
										Ctrl vs. RTN3-2	0.0038	**
										MIF
										Ctrl vs. RTN3-1	0.3036	ns
										Ctrl vs. RTN3-2	0.3404	ns
										OSM
										Ctrl vs. RTN3-1	0.03	*
										Ctrl vs. RTN3-2	<0.0001	****
										TBX21
										Ctrl vs. RTN3-1	<0.0001	****
										Ctrl vs. RTN3-2	0.0357	*
										NKG2A
										Ctrl vs. RTN3-1	<0.0001	****
										Ctrl vs. RTN3-2	<0.0001	****
										NAMPT
										Ctrl vs. RTN3-1	0.5636	ns
										Ctrl vs. RTN3-2	0.5859	ns
										NKP30
										Ctrl vs. RTN3-1	0.0315	*
										Ctrl vs. RTN3-2	0.0003	***
										NKP44
										Ctrl vs. RTN3-1	0.0231	*
										Ctrl vs. RTN3-2	0.0028	**
										FOXP3
										Ctrl vs. RTN3-1	0.0004	***
										Ctrl vs. RTN3-2	<0.0001	****
