# Supplementary material for: RTN3 inhibits RIG-I-mediated antiviral responses by impairing TRIM25-mediated K63-linked polyubiquitination
Source: eLife. 2021 Jul 27;10:e68958. doi: 10.7554/eLife.68958 (PMC8315805; doi:10.7554/eLife.68958)
Supplement: Figure 2—figure supplement 1—source data 9. [file elife-68958-fig2-figsupp1-data9.xlsx]

## Sheet: Sheet1
IL-1α	forward	5'-TGTATGTGACTGCCCAAGATGAAG-3'	FOXP3	forward	5'-GGCACAATGTCTCCTCCAGAGA-3'
	reverse	5'-AGAGGAGGTTGGTCTCACTACC-3'		reverse	5'-CAGATGAAGCCTTGGTCAGTGC-3'
IL-1β	forward	5'-CCACAGACCTTCCAGGAGAATG-3'	MIF	forward	5'-AGAACCGCTCCTACAGCAAGCT-3'
	reverse	5'-GTGCAGTTCAGTGATCGTACAGG-3'		reverse	5'-GGAGTTGTTCCAGCCCACATTG-3'
IL-2	forward	5'-AGAACTCAAACCTCTGGAGGAAG-3'	OSM	forward	5'-GAAAGAGTACCGCGTGCTCCTT-3'
	reverse	5'-GCTGTCTCATCAGCATATTCACAC-3'		reverse	5'-CTCTCAGTTTAGGAACATCCAGG-3'
IL-3	forward	5'-AAGCAGCCACCTTTGCCTTTGC-3'	TBX21	forward	5'-ATTGCCGTGACTGCCTACCAGA-3'
	reverse	5'-ACAGCCCTGTTGAATGCCTCCA-3'		reverse	5'-GGAATTGACAGTTGGGTCCAGG-3'
IL-4	forward	5'-CCGTAACAGACATCTTTGCTGCC-3'	LTα	forward	5'-ACACCTTCAGCTGCCCAGACTG-3'
	reverse	5'-GAGTGTCCTTCTCATGGTGGCT-3'		reverse	5'-TCCGTGTTTGCTCTCCAGAGCA-3'
IL-5	forward	5'-GGAATAGGCACACTGGAGAGTC-3'	LTβ	forward	5'-GGTTTCAGAAGCTGCCAGAGGA-3'
	reverse	5'-CTCTCCGTCTTTCTTCTCCACAC-3'		reverse	5'-CGTCAGAAACGCCTGTTCCTTC-3'
IL-6	forward	5'-AGACAGCCACTCACCTCTTCAG-3'	NKP30	forward	5'-CCAGCATCTACGTGTGCAGAGT-3'
	reverse	5'-TTCTGCCAGTGCCTCTTTGCTG-3'		reverse	5'-GCATAGAATCCAGCCCGAAGGA-3'
IL-7	forward	5'-GACAGCATGAAAGAAATTGGTAGC-3'	NKP44	forward	5'-CTGAGTCTCCATCTACCATCCC-3'
	reverse	5'-CAACTTGCGAGCAGCACGGAAT-3'		reverse	5'-TCTTGGCTACGAGGAGTCCACA-3'
IL-10	forward	5'-TCTCCGAGATGCCTTCAGCAGA-3'	NKG2A	forward	5'-GCCTCTGTGGTAACGATAGTTGT-3'
	reverse	5'-TCAGACAAGGCTTGGCAACCCA-3'		reverse	5'-ATCCACTCCTCAGGACAATGGC-3'
IL-13	forward	5'-ACGGTCATTGCTCTCACTTGCC-3'	NAMPT	forward	5'-AGGGTTACAAGTTGCTGCCACC-3'
	reverse	5'-CTGTCAGGTTGATGCTCCATACC-3'		reverse	5'-CTCCACCAGAACCGAAGGCAAT-3'
IL-16	forward	5'-TTGGACACAGGGTTCTCGCTCA-3'	IL-2Rα	forward	5'-GAGACTTCCTGCCTCGTCACAA-3'
	reverse	5'-AGCAGGGAGATAACGGACTGAC-3'		reverse	5'-GATCAGCAGGAAAACACAGCCG-3'
IL-17A	forward	5'-CGGACTGTGATGGTCAACCTGA-3'	IL-2Rβ	forward	5'-GGTGGAACCAAACCTGTGAGCT-3'
	reverse	5'-GCACTTTGCCTCCCAGATCACA-3'		reverse	5'-GGTGACGATGTCAACTGTGGTC-3'
IL-17F	forward	5'-AACCAGCGCGTTTCCATGTCAC-3'	IL-7R	forward	5'-ATCGCAGCACTCACTGACCTGT-3'
	reverse	5'-GAGCATTGATGCAGCCCAAGTTC-3'		reverse	5'-TCAGGCACTTTACCTCCACGAG-3'
IL-17C	forward	5'-GCCCTCAGCTACGACCCAGTG-3'	IL-18R1	forward	5'-GGAGGCACAGACACCAAAAGCT-3'
	reverse	5'-AGCTTCTGTGGATAGCGGTCCT-3'		reverse	5'-AGGCACACTACTGCCACCAAGA-3'
IL-18	forward	5'-GATAGCCAGCCTAGAGGTATGG-3'	IL-18BP	forward	5'-GTGTCCAGCATTGGAAGTGACC-3'
	reverse	5'-CCTTGATGTTATCAGGAGGATTCA-3'		reverse	5'-GGAGGTGCTCAATGAAGGAACC-3'
IL-22	forward	5'-GTTCCAGCCTTATATGCAGGAGG-3'	IL-33	forward	5'-GCCTGTCAACAGCAGTCTACTG-3'
	reverse	5'-GCACATTCCTCTGGATATGCAGG-3'		reverse	5'-TGTGCTTAGAGAAGCAAGATACTC-3'
IL-26	forward	GGAAGACGTTTTTGGTCAACTGC-3'	IL-1RII	forward	5'-GGCTATTACCGCTGTGTCCTGA-3'
	reverse	5'-CTCTCTAGCTGATGAAGCACAGG-3'		reverse	5'-GAGAAGCTGATATGGTCTTGAGG-3'
