# Supplementary material for: RTN3 inhibits RIG-I-mediated antiviral responses by impairing TRIM25-mediated K63-linked polyubiquitination
Source: eLife. 2021 Jul 27;10:e68958. doi: 10.7554/eLife.68958 (PMC8315805; doi:10.7554/eLife.68958)
Supplement: Figure 2—source data 2. [file elife-68958-fig2-data2.xlsx]

## Sheet: Sheet1
					Dunnett's multiple comparisons test				Dunnett's multiple comparisons test				Dunnett's multiple comparisons test
	RIG-I(N)	RTN3	ISRE-luc			P value summary	IFNβ-luc			P value summary	NF-kB-luc			P value summary
	-	-	1.01216	0.987835			0.894329	1.10567			0.920277	1.07972
	+	-	87.5319	85.7351			53.8746	53.8565			72.2267	63.8858
	+	+	47.6678	52.3386	<0.0001	****	40.4126	36.2854	0.0018	**	41.0979	47.242	0.0066	**
	+	++	29.1311	29.4418	<0.0001	****	23.596	25.959	0.0002	***	23.8668	23.2378	0.0006	***
