# Supplementary material for: RTN3 inhibits RIG-I-mediated antiviral responses by impairing TRIM25-mediated K63-linked polyubiquitination
Source: eLife. 2021 Jul 27;10:e68958. doi: 10.7554/eLife.68958 (PMC8315805; doi:10.7554/eLife.68958)
Supplement: Figure 2—source data 3. [file elife-68958-fig2-data3.xlsx]

## Sheet: Sheet1
				Dunnett's multiple comparisons test				Dunnett's multiple comparisons test
	RTN3	poly(I:C)			P value summary	SeV			P value summary
	-	0.97158	1.02842			0.992263	1.00774
	-	55.1986	54.0154			60.4366	57.001
	+	39.37	41.8548	0.0014	**	38.5182	37.1566	0.0019	**
	++	16.6606	16.2127	0.0002	***	11.4114	12.1152	0.0001	***
