# Supplementary material for: RTN3 inhibits RIG-I-mediated antiviral responses by impairing TRIM25-mediated K63-linked polyubiquitination
Source: eLife. 2021 Jul 27;10:e68958. doi: 10.7554/eLife.68958 (PMC8315805; doi:10.7554/eLife.68958)
Supplement: Figure 2—source data 4. [file elife-68958-fig2-data4.xlsx]

## Sheet: Sheet1
		VSV gRNA
	VSV-eGFP	mRNA (fold)
	Time (h)	HA-Ev		HA-RTN3		P value by t test	P value summary
	15	26.507	25.4272	853.817	883.927	<0.0001	****
	18	319.197	319.197	2735.87	2952.63	0.0031	**
