# Supplementary material for: RTN3 inhibits RIG-I-mediated antiviral responses by impairing TRIM25-mediated K63-linked polyubiquitination
Source: eLife. 2021 Jul 27;10:e68958. doi: 10.7554/eLife.68958 (PMC8315805; doi:10.7554/eLife.68958)
Supplement: Figure 2—source data 5. [file elife-68958-fig2-data5.xlsx]

## Sheet: Sheet1
	Gray Intensity			Relative fold change		Gray Intensity			Relative fold change							Sidak's multiple comparisons test
	pIKKαβ #1	Actin #1				pIKKαβ #2	Actin #2
				0.172957					0.0390714		VSV-eGFP
	268255	1550988	0.172957	1		65101	1666204	0.0390714	1		Time (h)	HA-Ev		HA-RTN3			P value summary
	1193436	1577910	0.75634	4.37298		346487	1854943	0.186791	4.78076		0	1	1	1.1037	0.771039	0.9988	ns
	1161169	1729833	0.671261	3.88107		324570	1561050	0.207918	5.32148		4	4.78076	4.37298	1.70585	1.96061	0.0026	**
	247193	1853619	0.133357	0.771039		75199	1743827	0.043123	1.1037		8	5.32148	3.88107	2.19583	2.12719	0.0048	**
	563719	1662383	0.339103	1.96061		97650	1465115	0.0666501	1.70585
	660375	1794921	0.367913	2.12719		126149	1470367	0.0857942	2.19583
	pTBK1 #1	TBK1 #1				pTBK1 #2	TBK1 #2
				0.231665					0.136422							Sidak's multiple comparisons test
	317687	1371318	0.231665	1		148490	1092059	0.136422	1
	1881470	907287	2.07373	8.95141		936871	804697	1.16425	8.5342		VSV-eGFP
	1252920	979953	1.27855	5.51895		960697	1088460	0.879712	6.44845		Time (h)	HA-Ev		HA-RTN3			P value summary
	311511	972868	0.320199	1.38216		146553	1083985	0.135198	0.99103		0	1	1	0.99103	1.38216	0.989	ns
	589786	818935	0.720187	3.10874		153338	910928	0.168332	1.2339		4	8.5342	8.95141	1.2339	3.10874	0.0001	***
	529252	1104621	0.479125	2.06818		351774	1103663	0.318733	2.33637		8	6.44845	5.51895	2.33637	2.06818	0.0029	**
	pP65 #1	P65 #1				pP65 #2	P65 #2
				0.113992					0.103536							Sidak's multiple comparisons test
	154154	1352318	0.113992	1		173793	1678575	0.103536	1
	618635	854295	0.724147	6.35259		896883	1534172	0.584604	5.64638		VSV-eGFP
	323681	1399533	0.231278	2.02889		365027	1558494	0.234218	2.26219		Time (h)	HA-Ev		HA-RTN3			P value summary
	67636	1559144	0.0433802	0.380553		88483	1466939	0.0603181	0.582581		0	1	1	0.582581	0.380553	0.1869	ns
	121204	1394846	0.0868942	0.76228		107911	1428623	0.075535	0.729552		4	5.64638	6.35259	0.729553	0.76228	<0.0001	****
	55527	1528070	0.036338	0.318776		89822	1602045	0.0560671	0.541522		8	2.26219	2.02889	0.541522	0.318776	0.0009	***
	pIRF3 #1	IRF3 #1				pIRF3 #2	IRF3 #2
				0.359451					0.542986							Sidak's multiple comparisons test
	505778	1407086	0.359451	1		691933	1274312	0.542986	1
	920432	1359105	0.677234	1.88408		1602458	1027865	1.55902	2.87119		VSV-eGFP
	1161320	1185741	0.979404	2.72473		880130	1033581	0.851535	1.56825		Time (h)	HA-Ev		HA-RTN3			P value summary
	129092	1456079	0.0886573	0.246647		137719	1118093	0.123173	0.226844		0	1	1	0.226844	0.246647	0.3763	ns
	297582	1761268	0.168959	0.470048		388108	791664	0.490243	0.902866		4	2.87119	1.88408	0.902866	0.470048	0.0298	*
	131697	1594561	0.0825914	0.229771		121511	1187027	0.102366	0.188524		8	1.56825	2.72473	0.188524	0.229771	0.0162	*
