# Supplementary material for: RTN3 inhibits RIG-I-mediated antiviral responses by impairing TRIM25-mediated K63-linked polyubiquitination
Source: eLife. 2021 Jul 27;10:e68958. doi: 10.7554/eLife.68958 (PMC8315805; doi:10.7554/eLife.68958)
Supplement: Figure 2—source data 6. [file elife-68958-fig2-data6.xlsx]

## Sheet: Sheet1
		IFNβ				Sidak's multiple comparisons test	P value summary
	VSV-eGFP	mRNA (fold)
	Time (h)	HA-Ev		HA-RTN3
	0	0.682158	1.31784	1.08643	0.913573	>0.9999	ns
	12	1.01268	1.2997	1.74061	1.45356	>0.9999	ns
	15	2.67248	1.98368	2.98885	3.36263	>0.9999	ns
	18	6.05521	6.44499	0.673426	0.888591	0.9284	ns
	21	21.9809	32.6311	3.50543	6.58686	0.0124	*
	24	88.5351	63.0392	24.754	22.9368	<0.0001	****
		IFIT1				Sidak's multiple comparisons test	P value summary
	VSV-eGFP	mRNA (fold)
	Time (h)	HA-Ev		HA-RTN3
	0	0.791684	1.20832	0.347219	0.454994	>0.9999	ns
	12	1.16716	1.21672	1.29587	0.704132	>0.9999	ns
	15	2.48457	1.93589	0.897459	1.08216	0.9987	ns
	18	14.9596	22.3623	3.98317	3.56504	0.0011	**
	21	21.6006	30.7603	8.47914	6.03736	0.0001	***
	24	39.2059	40.3081	31.6453	25.3501	0.0098	**
		IFIT2				Sidak's multiple comparisons test	P value summary
	VSV-eGFP	mRNA (fold)
	Time (h)	HA-Ev		HA-RTN3
	0	0.920456	1.07954	0.250529	0.501059	0.9999	ns
	12	1.81557	1.20616	0.948061	1.05194	>0.9999	ns
	15	1.53732	1.4544	1.48767	0.915766	>0.9999	ns
	18	7.0149	10.059	2.06058	2.60819	0.081	ns
	21	25.2887	20.6837	3.39415	4.83344	<0.0001	****
	24	83.3102	78.8163	22.6753	15.0642	<0.0001	****
		TNFα				Sidak's multiple comparisons test	P value summary
	VSV-eGFP	mRNA (fold)
	Time (h)	HA-Ev		HA-RTN3
	0	0.791684	1.20832	1.05194	0.948061	>0.9999	ns
	12	5.95044	2.45037	3.81862	3.34742	>0.9999	ns
	15	3.66293	5.78773	1.81888	1.84427	0.9974	ns
	18	32.7403	39.2059	11.5759	8.12885	0.0046	**
	21	68.2614	78.9571	23.9682	19.4683	<0.0001	****
	24	145.311	121.347	34.132	27.9166	<0.0001	****
		CCL20				Sidak's multiple comparisons test	P value summary
	VSV-eGFP	mRNA (fold)
	Time (h)	HA-Ev		HA-RTN3
	0	1.07954	0.920456	1.27678	0.723221	>0.9999	ns
	12	1.55878	1.1411	1.63865	1.0962	>0.9999	ns
	15	1.05733	1.03557	0.483809	0.387565	>0.9999	ns
	18	9.26961	4.29455	3.16109	1.39515	0.9925	ns
	21	8.83058	10.004	3.78534	2.5676	0.9616	ns
	24	218.338	182.332	16.4784	13.8567	<0.0001	****
		IL-6				Sidak's multiple comparisons test	P value summary
	VSV-eGFP	mRNA (fold)
	Time (h)	HA-Ev		HA-RTN3
	0	1.38464	0.615362	1.25747	0.742531	>0.9999	ns
	12	1.7648	1.08637	0.847052	0.742531	>0.9999	ns
	15	5.69827	4.37876	1.23073	0.972324	0.9985	ns
	18	34.2851	37.0014	8.45921	4.69304	0.0357	*
	21	34.7881	36.2654	26.7137	25.2727	0.8789	ns
	24	575.834	533.561	22.9516	18.9027	<0.0001	****
