# Supplementary material for: RTN3 inhibits RIG-I-mediated antiviral responses by impairing TRIM25-mediated K63-linked polyubiquitination
Source: eLife. 2021 Jul 27;10:e68958. doi: 10.7554/eLife.68958 (PMC8315805; doi:10.7554/eLife.68958)
Supplement: Figure 3—source data 2. [file elife-68958-fig3-data2.xlsx]

## Sheet: Sheet1
		RTN3
	shRNA	mRNA (fold)		P value by t test	P value summary
	Ctrl	1.01386	0.986138
	#1	0.582311	0.562475	0.0016	**
	#2	0.615513	0.624105	0.0015	**
