# Supplementary material for: RTN3 inhibits RIG-I-mediated antiviral responses by impairing TRIM25-mediated K63-linked polyubiquitination
Source: eLife. 2021 Jul 27;10:e68958. doi: 10.7554/eLife.68958 (PMC8315805; doi:10.7554/eLife.68958)
Supplement: Figure 3—source data 3. [file elife-68958-fig3-data3.xlsx]

## Sheet: Sheet1
	Gray Intensity			Relative fold change		Gray Intensity			Relative fold change							Sidak's multiple comparisons test
	pTBK1 #1	TBK1 #1				pTBK1 #2	TBK1 #2
				0.045915					0.041611		VSV-eGFP
	4746	103365	0.045915	1		2678	64358	0.041611	1		Time (h)	NC		RTN3 KD			P value summary
	9478	88218	0.107438	2.33994		8660	57221	0.151343	3.63709		0	1	1	0.451423	0.4326	0.8044	ns
	18532	91798	0.201878	4.39678		13953	65616	0.212646	5.11034		15	2.33994	3.63709	3.82383	4.58499	0.29	ns
	2003	96637	0.0207271	0.451423		1252	69552	0.0180009	0.4326		18	4.39678	5.11034	8.14522	9.62973	0.002	**
	16622	94674	0.175571	3.82383		11906	62405	0.190786	4.58499
	38974	104212	0.373988	8.14522		24983	62348	0.400703	9.62973
	pP65 #1	P65 #1				pP65 #2	P65 #2									Sidak's multiple comparisons test
				0.472581					0.545063
	49457	104653	0.472581	1		49924	91593	0.545063	1		VSV-eGFP
	63326	87751	0.721656	1.52705		65990	84151	0.784186	1.43871		Time (h)	NC		RTN3 KD			P value summary
	83838	94342	0.88866	1.88044		70750	96094	0.736258	1.35078		0	1	1	1.09597	1.16481	0.8366	ns
	53117	102555	0.517937	1.09597		54624	86036	0.634897	1.16481		15	1.52705	1.43871	1.99429	2.05642	0.0464	*
	89472	94934	0.942465	1.99429		81116	72368	1.12088	2.05642		18	1.88044	1.35078	1.7916	1.64863	0.9053	ns
	82097	96964	0.846675	1.7916		69288	77106	0.898607	1.64863
	pIRF3 #1	IRF3 #1				pIRF3 #2	IRF3 #2									Sidak's multiple comparisons test
				0.726595					0.0783227
	60800	83678	0.726595	1		59010	753421	0.0783227	1		VSV-eGFP
	63545	81888	0.775999	1.06799		63590	798311	0.0796557	1.01702		Time (h)	NC		RTN3 KD			P value summary
	67200	85054	0.790086	1.08738		65995	839666	0.0785967	1.0035		0	1	1	1.07533	0.997063	0.8573	ns
	65252	83514	0.78133	1.07533		60471	774349	0.0780927	0.997063		15	1.06799	1.01702	1.43224	1.46947	0.0004	***
	86302	82930	1.04066	1.43224		60579	526350	0.115093	1.46947		18	1.08738	1.0035	1.6097	1.71099	<0.0001	****
	97125	83041	1.1696	1.6097		91425	682230	0.134009	1.71099
