# Supplementary material for: RTN3 inhibits RIG-I-mediated antiviral responses by impairing TRIM25-mediated K63-linked polyubiquitination
Source: eLife. 2021 Jul 27;10:e68958. doi: 10.7554/eLife.68958 (PMC8315805; doi:10.7554/eLife.68958)
Supplement: Figure 3—source data 4. [file elife-68958-fig3-data4.xlsx]

## Sheet: Sheet1
		IFNβ				Sidak's multiple comparisons test	P value summary
	VSV-eGFP	mRNA (fold)
	Time (h)	NC		RTN3 KD
	0	0.979209	1.02079	1.0623	0.937698	>0.9999	ns
	12	3.67995	3.97151	3.598	4.78061	>0.9999	ns
	15	38.311	38.0464	31.4981	26.6709	0.9282	ns
	18	93.6812	92.3915	70.3849	69.8987	0.1788	ns
	21	209.338	206.456	192.297	147.768	0.0105	*
	24	179.73	180.98	141.749	130.436	0.0032	**
		IFIT1				Sidak's multiple comparisons test	P value summary
	VSV-eGFP	mRNA (fold)
	Time (h)	NC		RTN3 KD
	0	0.892974	1.10703	0.979209	1.02079	>0.9999	ns
	12	2.61478	2.57878	2.54857	2.49612	>0.9999	ns
	15	6.71175	7.24351	4.16896	4.08317	0.0003	***
	18	7.55111	6.48313	5.65563	4.25656	0.0052	**
	21	7.04544	7.98166	7.20845	6.27532	0.5522	ns
	24	6.99677	7.24351	6.06156	6.18892	0.2883	ns
		IFIT2				Sidak's multiple comparisons test	P value summary
	VSV-eGFP	mRNA (fold)
	Time (h)	NC		RTN3 KD
	0	0.954976	1.04502	0.749259	0.744083	>0.9999	ns
	12	1.93661	2.0329	1.69765	1.75751	>0.9999	ns
	15	5.32779	5.55403	4.32751	4.35761	0.8565	ns
	18	10.3642	10.5089	7.58704	7.07895	0.0432	*
	21	15.3859	16.7204	16.4902	12.1555	0.4601	ns
	24	14.6572	14.6572	11.7414	10.582	0.0206	*
		TNFα				Sidak's multiple comparisons test	P value summary
	VSV-eGFP	mRNA (fold)
	Time (h)	NC		RTN3 KD
	0	1.13775	0.862252	0.920456	1.07954	>0.9999	ns
	12	2.2755	2.57787	1.84091	2.14417	0.9999	ns
	15	9.16529	8.79194	6.45502	5.61942	0.338	ns
	18	18.8459	17.8293	15.1413	14.2256	0.1541	ns
	21	34.2061	36.1565	31.7882	25.9997	0.006	**
	24	32.3609	34.444	23.9246	21.4131	<0.0001	****
		CCL20				Sidak's multiple comparisons test	P value summary
	VSV-eGFP	mRNA (fold)
	Time (h)	NC		RTN3 KD
	0	0.989603	1.0104	0.993069	1.00693	>0.9999	ns
	12	2.02079	1.85951	1.6586	1.54753	>0.9999	ns
	15	10.3742	11.7527	6.02084	5.93795	0.0494	*
	18	22.2375	24.5036	14.0254	12.1254	0.0002	***
	21	33.4729	37.3989	29.2419	24.0834	0.0009	***
	24	31.0156	29.9591	20.9658	18.0005	0.0001	***
		IL-6				Sidak's multiple comparisons test	P value summary
	VSV-eGFP	mRNA (fold)
	Time (h)	NC		RTN3 KD
	0	1.05885	0.941151	1.03118	0.968818	>0.9999	ns
	12	2.04556	2.04556	0.982343	1.60692	0.3787	ns
	15	4.06287	3.61125	2.03397	2.1057	0.0039	**
	18	5.17837	6.55455	2.83687	2.6653	<0.0001	****
	21	8.52971	8.01386	3.54135	2.68384	<0.0001	****
	24	6.88042	6.69228	0.604703	0.744477	<0.0001	****
