# Supplementary material for: RTN3 inhibits RIG-I-mediated antiviral responses by impairing TRIM25-mediated K63-linked polyubiquitination
Source: eLife. 2021 Jul 27;10:e68958. doi: 10.7554/eLife.68958 (PMC8315805; doi:10.7554/eLife.68958)
Supplement: Figure 3—source data 5. [file elife-68958-fig3-data5.xlsx]

## Sheet: Sheet1
		VSV gRNA				Sidak's multiple comparisons test	P value summary
	VSV-eGFP	mRNA (fold)
	Time (h)	NC		RTN3 KD
	0	0.798294	0.929799	1.00347	0.996534	>0.9999	ns
	12	1.08297	1.03885	1.10572	1.18509	>0.9999	ns
	15	1.834	2.13612	2.52274	2.33754	>0.9999	ns
	18	27.3789	28.5415	21.481	24.1674	>0.9999	ns
	21	144.507	145.512	78.5202	74.8013	0.3751	ns
	24	1891.08	1728.12	1291.64	1346.49	<0.0001	****
