# Supplementary material for: RTN3 inhibits RIG-I-mediated antiviral responses by impairing TRIM25-mediated K63-linked polyubiquitination
Source: eLife. 2021 Jul 27;10:e68958. doi: 10.7554/eLife.68958 (PMC8315805; doi:10.7554/eLife.68958)
Supplement: Figure 5—source data 2. [file elife-68958-fig5-data2.xlsx]

## Sheet: Sheet1
	Gray Intensity		Relative fold change			Gray Intensity		Relative fold change
	pTBK1 #1	TBK1 #1				pTBK1 #2	TBK1 #2
				0.139616					0.0496602							Sidak's multiple comparisons test
	94377	675975	0.139616	1		32230	649011	0.0496602	1
	666165	483530	1.37771	9.86786		215056	578843	0.371527	7.48139		poly (I:C）
	538055	663475	0.810965	5.80853		150988	551406	0.273824	5.51395		Time (h)	HA-Ev		HA-RTN3			P value summary
	114467	487258	0.234921	1.68262		40466	631511	0.0640781	1.29033	shCtrl	0	1	1	1.29033	1.68262	0.9745
	277450	688605	0.402916	2.88589		87053	606572	0.143516	2.88997		18	7.48139	9.86786	2.88997	2.88589	<0.0001	****
	423886	570888	0.742503	5.31818		143066	628645	0.227578	4.58271		21	5.51395	5.80853	4.58271	5.31818	0.8653
	436	582928	0.000747948	0.00535718		29603	644177	0.0459548	0.925385	shTRIM25	0	0.925385	0.00535718	1.11156	0.00064161	>0.9999
	227074	620671	0.365852	2.62042		50753	639305	0.0793878	1.59862		18	1.59862	2.62042	2.19799	2.15948	>0.9999
	213937	651170	0.328542	2.35318		74051	639553	0.115786	2.33156		21	2.33156	2.35318	2.05743	1.86142	0.9924
	61	680964	8.95789e-05	0.000641609		32171	582806	0.0552002	1.11156
	196751	652579	0.301498	2.15948		68744	629797	0.109153	2.19799
	182392	701820	0.259884	1.86142		64715	633391	0.102172	2.05743
	pP65 #1	P65 #1				pP65 #2	P65 #2
				0.0980254				#DIV/0!	0.0271036							Sidak's multiple comparisons test
	36736	374760	0.0980254	1		17607	649618	0.0271036	1
	562360	442143	1.2719	12.9752		128329	634565	0.202231	7.46142		poly (I:C）
	414885	429903	0.965067	9.84507		91002	624511	0.145717	5.3763		Time (h)	HA-Ev		HA-RTN3			P value summary
	29872	411948	0.072514	0.739747		14513	679588	0.0213556	0.787924	shCtrl	0	1	1	0.787924	0.739747	>0.9999
	266904	434361	0.614475	6.26853		59719	714098	0.0836286	3.08551		18	7.46142	12.9752	3.08551	6.26853	0.0398	*
	128471	394858	0.32536	3.31914		34177	732863	0.0466349	1.72062		21	5.3763	9.84507	1.72062	3.31914	0.0644
	29956	463425	0.0646404	0.659425		14939	731912	0.0204109	0.75307	shTRIM25	0	0.75307	0.659425	0.724821	0.613115	>0.9999
	141661	386939	0.366107	3.73482		30571	687825	0.0444459	1.63985		18	1.63985	3.73482	1.72033	2.93255	>0.9999
	33843	447588	0.0756119	0.771351		12439	671963	0.0185114	0.682988		21	0.682988	0.771351	0.824367	0.500283	>0.9999
	26663	443638	0.0601008	0.613115		12610	641885	0.0196453	0.724821
	117506	408767	0.287464	2.93255		30899	662681	0.0466273	1.72033
	24050	490412	0.0490404	0.500283		14849	664583	0.0223433	0.824367
	pIRF3 #1	IRF3 #1				pIRF3 #2	IRF3 #2
				0.0280342					0.059945							Sidak's multiple comparisons test
	29334	1046366	0.0280342	1		77505	1292936	0.059945	1
	178708	903372	0.197823	7.05651		418193	1139188	0.367097	6.12391		poly (I:C）
	123898	921776	0.134412	4.79459		508879	1223550	0.415904	6.93809		Time (h)	HA-Ev		HA-RTN3			P value summary
	37075	971708	0.0381545	1.361		32268	1102669	0.0292635	0.488173	shCtrl	0	1	1	0.488173	1.361	>0.9999
	43162	945943	0.0456285	1.6276		157782	1157759	0.136282	2.27346		18	6.12391	7.05651	2.27346	1.6276	0.0001	***
	132934	1051271	0.126451	4.51059		240401	1179966	0.203736	3.39871		21	6.93809	4.79459	3.39871	4.51059	0.0892
	20742	979697	0.0211719	0.755216		12874	1192826	0.0107929	0.180046	shTRIM25	0	0.180046	0.755216	0.204341	0.600924	>0.9999
	54262	909409	0.0596673	2.12838		67290	1185440	0.0567637	0.946931		18	0.946931	2.12838	0.815184	1.84194	0.9998
	34629	954773	0.0362694	1.29376		71091	1171886	0.0606638	1.01199		21	1.01199	1.29376	0.947288	1.30707	>0.9999
	16494	979082	0.0168464	0.600924		16342	1334127	0.0122492	0.204341
	50653	980940	0.0516372	1.84194		62595	1280947	0.0488662	0.815184
	37359	1019553	0.0366425	1.30707		80528	1418117	0.0567852	0.947288
