# Supplementary material for: RTN3 inhibits RIG-I-mediated antiviral responses by impairing TRIM25-mediated K63-linked polyubiquitination
Source: eLife. 2021 Jul 27;10:e68958. doi: 10.7554/eLife.68958 (PMC8315805; doi:10.7554/eLife.68958)
Supplement: Figure 5—source data 3. [file elife-68958-fig5-data3.xlsx]

## Sheet: Sheet1
						Tukey's multiple comparisons test							Tukey's multiple comparisons test
		RIG-I(N)		ISRE-luc			P value summary		RIG-I(N)		NF-kB-luc			P value summary
		-	FL	0.889505	1.1105				-	FL	0.993527	1.00647
		+		132.623	137.604				+		66.5671	67.7669
		+		117.191	120.195	<0.0001	****		+		52.7994	55.6439	<0.0001	****
		+		98.4715	94.9741	<0.0001	****		+		29.4785	29.422	<0.0001	****
		-	T1	0.889505	1.1105				-	T1	0.993527	1.00647
		+		132.623	137.604				+		66.5671	67.7669
		+		109.682	100.115	<0.0001	****		+		35.7867	32.7939	<0.0001	****
		+		73.4715	78.9048	<0.0001	****		+		20.4986	20.8699	<0.0001	****
		-	T2	0.889505	1.1105				-	T2	0.993527	1.00647
		+		132.623	137.604				+		66.5671	67.7669
		+		100.022	94.1545	<0.0001	****		+		30.2623	28.3291	<0.0001	****
		+		64.5413	66.7843	<0.0001	****		+		15.2452	15.0621	<0.0001	****
		-	T3	0.889505	1.1105				-	T3	0.993527	1.00647
		+		132.623	137.604				+		66.5671	67.7669
		+		66.0015	66.3159	<0.0001	****		+		10.7291	10.5021	<0.0001	****
		+		23.4768	16.6734	<0.0001	****		+		3.16248	3.27212	<0.0001	****
		-	T4	0.889505	1.1105				-	T4	0.993527	1.00647
		+		132.623	137.604				+		66.5671	67.7669	0.0475	*	Dunnett's multiple comparisons test
		+		122.001	122.746	0.0007			+		58.4325	59.8576	0.0405	*
		+		136.736	141.172	0.542			+		61.6743	55.7932
		-	T5	0.889505	1.1105				-	T5	0.993527	1.00647
		+		132.623	137.604				+		66.5671	67.7669
		+		97.2324	102.462	<0.0001	****		+		32.6745	31.3542	<0.0001	****
		+		64.6471	62.3384	<0.0001	****		+		10.4343	10.8129	<0.0001	****
		-	T6	0.889505	1.1105				-	T6	0.993527	1.00647
		+		132.623	137.604				+		66.5671	67.7669
		+		80.2517	80.7855	<0.0001	****		+		22.1167	21.977	<0.0001	****
		+		39.9766	39.8813	<0.0001	****		+		7.95693	8.1525	<0.0001	****
