# Supplementary material for: RTN3 inhibits RIG-I-mediated antiviral responses by impairing TRIM25-mediated K63-linked polyubiquitination
Source: eLife. 2021 Jul 27;10:e68958. doi: 10.7554/eLife.68958 (PMC8315805; doi:10.7554/eLife.68958)
Supplement: Figure 6—source data 2. [file elife-68958-fig6-data2.xlsx]

## Sheet: Sheet1
								Sidak's multiple comparisons test
	Mcp-1 pg/ml
		Ctrl			Rtn3				P value summary
	DMEM	112.46	63.24	247.42	99.76	227.94	68.07	0.9919	ns
	VSV	505.04	657.33	371.15	271.58	255.06	260.06	0.0259	*
								Sidak's multiple comparisons test
	Il-12p70 pg/ml
		Ctrl			Rtn3				P value summary
	DMEM	14.31	39.1	27.46	11.34	31.45	29.52	0.9997	ns
	VSV	188.81	822.8	476.27	76.95	29.18	31.1	0.0171	*
								Sidak's multiple comparisons test
	Ifn-γ pg/ml
		Ctrl			Rtn3				P value summary
	DMEM	1.42	1.1	1.07	0.61	0.84	0.31	0.974	ns
	VSV	5.66	19.43	15.41	2.73	1.82	2.16	0.0093	**
								Sidak's multiple comparisons test
	Tnf pg/ml
		Ctrl			Rtn3				P value summary
	DMEM	4.26	7.1	6.15	5.06	6.64	7.45	0.9576	ns
	VSV	29.2	23.76	26.46	12	17.55	10.55	0.0004	***
