# Supplementary material for: RTN3 inhibits RIG-I-mediated antiviral responses by impairing TRIM25-mediated K63-linked polyubiquitination
Source: eLife. 2021 Jul 27;10:e68958. doi: 10.7554/eLife.68958 (PMC8315805; doi:10.7554/eLife.68958)
Supplement: Figure 7—source data 1. [file elife-68958-fig7-data1.xlsx]

## Sheet: Sheet1
		Liver inflammation score								Sidak's multiple comparisons test
		Ctrl				Rtn3					P value summary
	DMEM	1.36428	1.39185	0.766733	0.477135	0.654933	1.67401	1.95808	2.74672	0.98	ns
	VSV	39.9126	60.0135	42.0756	33.2889	11.7791	5.90416	10.7732	8.03771	<0.0001	****
