# Supplementary material for: RTN3 inhibits RIG-I-mediated antiviral responses by impairing TRIM25-mediated K63-linked polyubiquitination
Source: eLife. 2021 Jul 27;10:e68958. doi: 10.7554/eLife.68958 (PMC8315805; doi:10.7554/eLife.68958)
Supplement: Figure 7—source data 2. [file elife-68958-fig7-data2.xlsx]

## Sheet: Sheet1
		Rtn3 IHC score								Sidak's multiple comparisons test
		Ctrl				Rtn3					P value summary
	DMEM	1	0.46	1	1.55	5.36	6.64	5.66	5.7	<0.0001	****
	VSV	3.65	2.42	2.89	3.36	6.76	6.6	6.79	7.3	<0.0001	****
