# Supplementary material for: RTN3 inhibits RIG-I-mediated antiviral responses by impairing TRIM25-mediated K63-linked polyubiquitination
Source: eLife. 2021 Jul 27;10:e68958. doi: 10.7554/eLife.68958 (PMC8315805; doi:10.7554/eLife.68958)
Supplement: Figure 7—source data 3. [file elife-68958-fig7-data3.xlsx]

## Sheet: Sheet1
		Lung inflammation score								Sidak's multiple comparisons test
		Ctrl				Rtn3					P value summary
	DMEM	0.94	0.96	1.04	1.07	0.81	0.97	1.12	1.23	0.9521	ns
	VSV	2.13	1.99	2.37	2.27	1.35	1.51	1.55	1.21	<0.0001	****
